# Supplementary material
Source: Royal Society of Chemistry journal article supplement (doi:10.1039/d6se00563b)
Supplement: d6se00563b1.pdf [file d6se00563b1.pdf]

## Supporting Information

### Niobium Decorated 2D Biphenylene as High-Capacity Hydrogen Storage Material: Combined DFT and AIMD Simulations

H Meera<sup>a, b</sup>, Sk Musharaf Ali<sup>b, c</sup>, Nandini Garg<sup>c, d</sup>, Brahmananda Chakraborty<sup>c, d\*</sup>

<sup>a</sup> Department of Physics, Amrita School of Physical Sciences, Amrita Vishwa Vidyapeetham, Amritapuri, Kerala, 690525

<sup>b</sup> Chemical Engineering Division, Bhabha Atomic Research Centre, Trombay, Mumbai, 400085, India

<sup>c</sup> Homi Bhabha National Institute, Mumbai, 400094, India

<sup>d</sup> High Pressure and Synchrotron Radiation Physics Division, Bhabha Atomic Research Centre, Trombay, Mumbai, 400085, India.

Email of Corresponding author: [brahma@barc.gov.in](mailto:brahma@barc.gov.in)

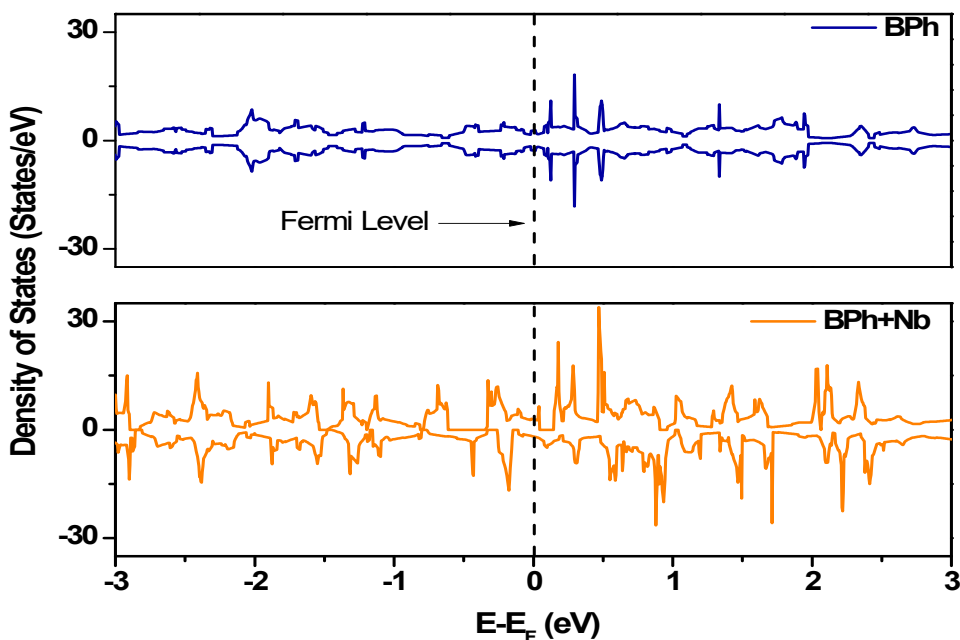

Figure S1: Total Density of States (TDOS) plot for BPh (upper panel) and BPh+Niobium (lower panel). Here, the Fermi level is set to 0 eV and is denoted by a dotted line. The x and y axes indicate Energy (eV) and Density of States (States / eV)

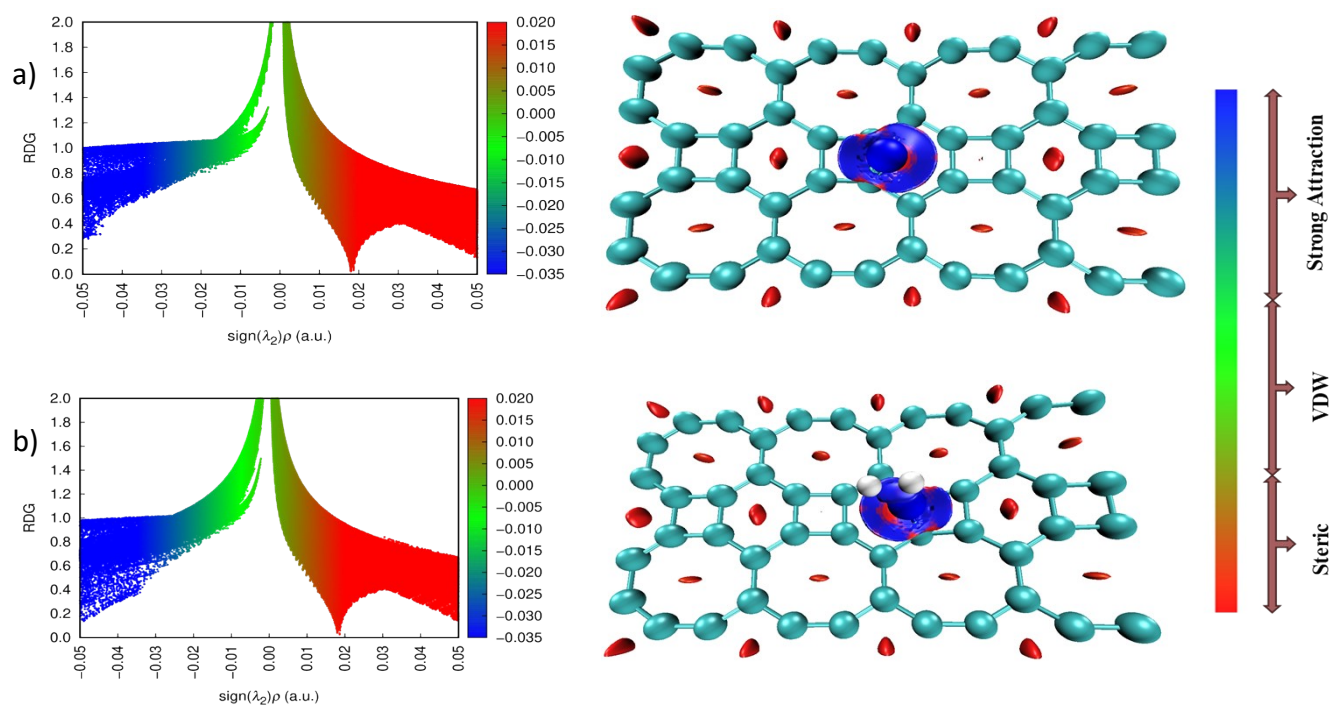

Figure S2: RDG scatter plots for a)  $BPh+Nb$  and b)  $BPh+Nb+1H_2$  systems

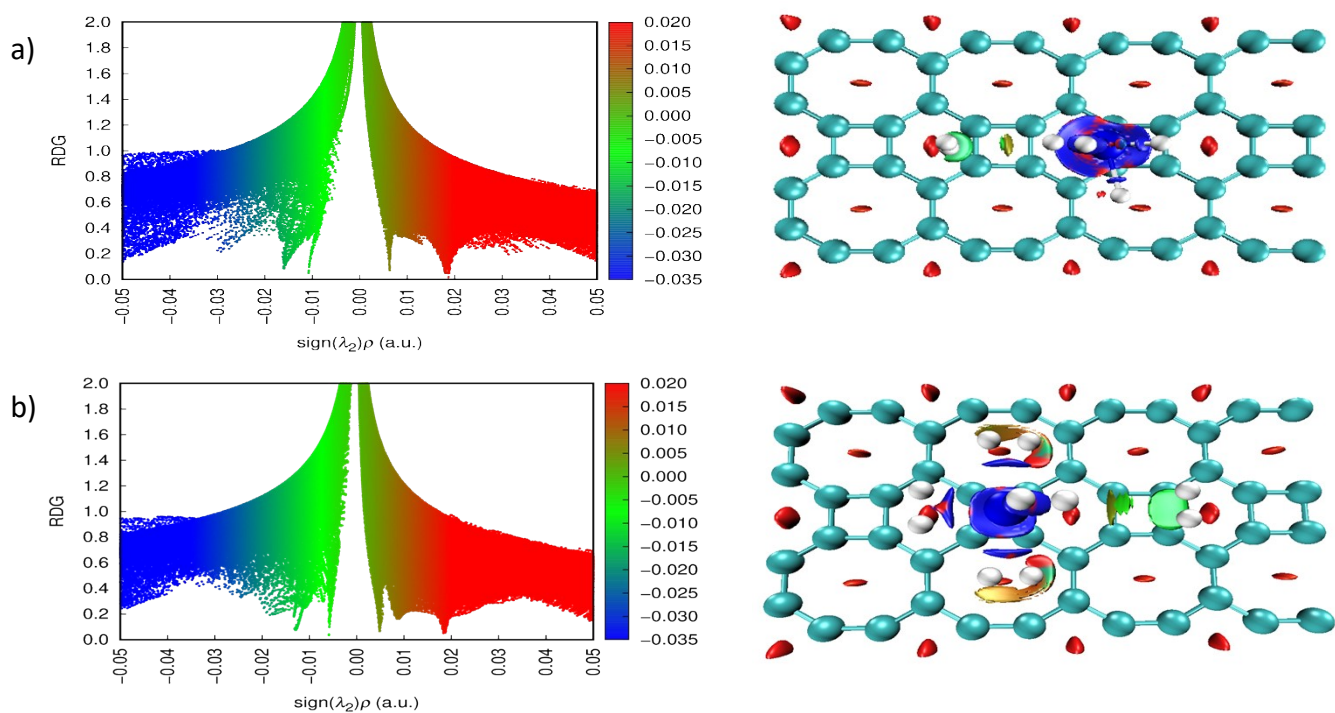

Figure S3: RDG scatter plots for a)  $BPh+Nb+3H_2$  and b)  $BPh+Nb+5H_2$  systems

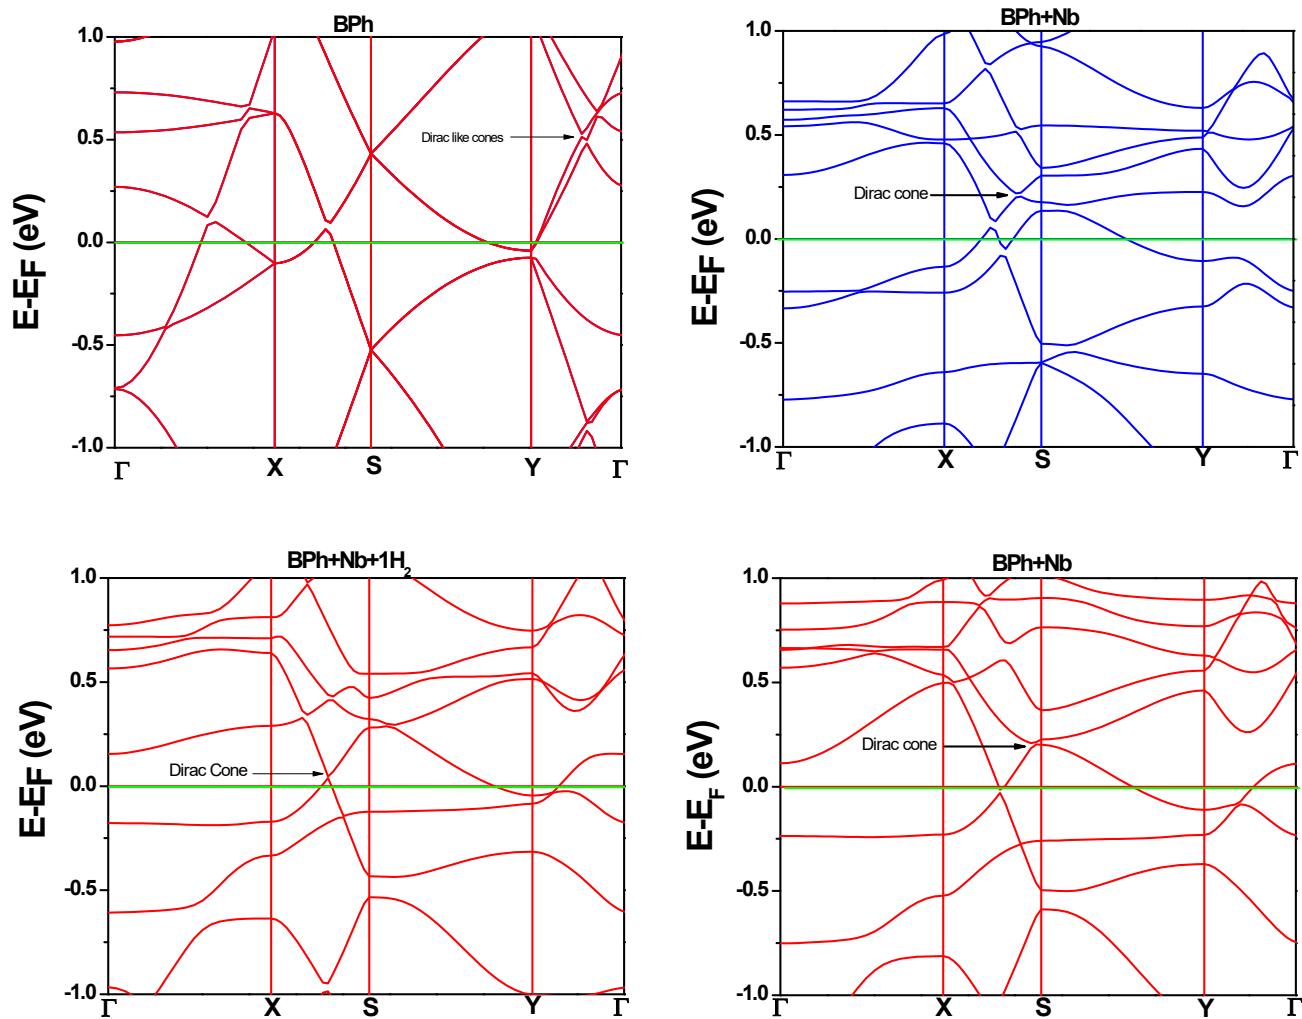

Figure S4: Band structure plot of pristine BPh, BPh+Nb and BPh+Nb+1H<sub>2</sub> with Dirac like cones. (Red, blue and green color indicates spin-up, spin down states and fermi level respectively)

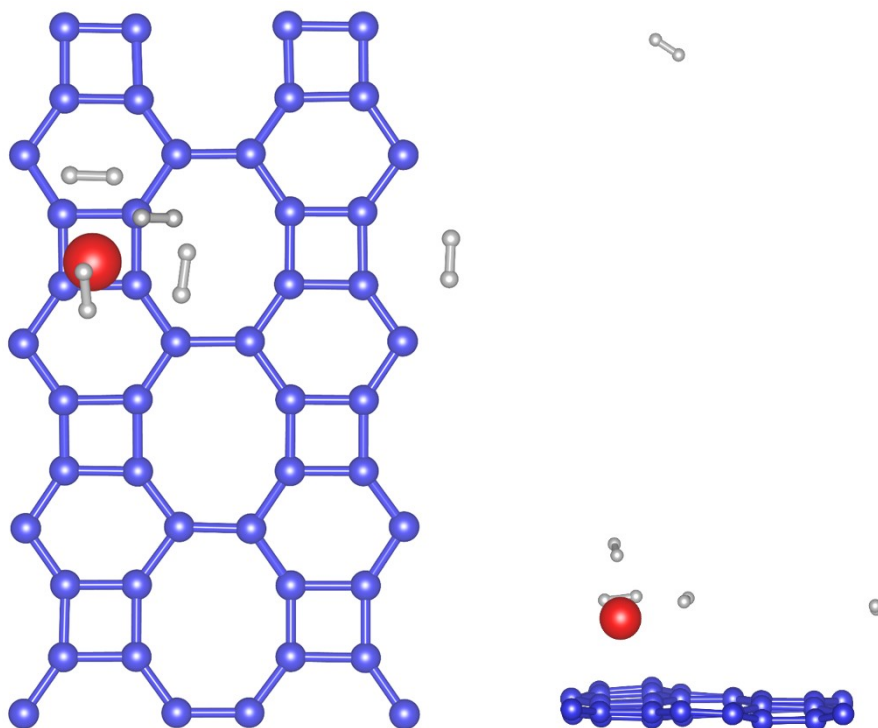

Figure S5: AIMD profile of  $BPh+Nb+5H_2$  after 10 ps and a timestep of 1 fs at ambient conditions

Table S1: Vacuum Potential and Work functions for the systems, BPh, BPh+ Nb and BPh+Nb+1H<sub>2</sub>

| System                   | Vacuum Potential(eV) | Work Function(eV) |
|--------------------------|----------------------|-------------------|
| BPh                      | 0.82                 | 4.17              |
| BPh+ Nb                  | 0.96                 | 3.87              |
| BPh+ Nb+ 1H <sub>2</sub> | 1.05                 | 4.19              |

Table S2: Comparison of Hydrogen storage capacity of BPh-Nb system with other nanomaterials

| Material                     | Hydrogen Uptake Capacity | Eads(eV/H <sub>2</sub> ) | Desorption Temperature (K) | References |
|------------------------------|--------------------------|--------------------------|----------------------------|------------|
| 1Ti.C468                     | 6.713%                   | -0.199                   | 523.052                    | [67]       |
| Zr-BPh                       | 9.95%                    | -0.4                     | —                          | [32]       |
| Nb-planar circumcoronene     | —                        | -0.61                    | —                          | [68]       |
| Nb@ $\alpha$ Ge              | 6.11%                    | -0.43                    | —                          | [79]       |
| Nb- (h-BN)                   | —                        | -0.65                    | —                          | [68]       |
| Nb-(C6/h – BN)               | —                        | -0.58                    | —                          | [68]       |
| 2NGR@2Nb                     | 8 %                      | 0.465                    | 344                        | [73]       |
| 4Li@BN-BPh/C-BPh             | 6.44%                    | -0.306                   | —                          | [69]       |
| I-BPh                        | 10.78%                   | —                        | —                          | [70]       |
| Ca-BPh                       | 6.66%                    | -0.23                    | 280                        | [71]       |
| Sc-BPh                       | 6.40%                    | -0.33                    | 370                        | [71]       |
| V-BPh                        | 7.52 %                   | -0.51                    | 595.96                     | [72]       |
| Y@CNF                        | —                        | -0.108                   | —                          | [81]       |
| Zr@CNF                       | —                        | -0.081                   | —                          | [81]       |
| Nb@CNF                       | —                        | -0.072                   | —                          | [81]       |
| <b>Nb-BPh (present work)</b> | <b>5.76%</b>             | <b>-0.61</b>             | <b>380</b>                 | —          |

*Table S3: Average C-Nb distance with corresponding Binding energy for BPh+ Nb system with addition of H<sub>2</sub>*

| <b>System</b>            | <b>C-Nb Distance (Å)</b> | <b>BE (eV)</b> |
|--------------------------|--------------------------|----------------|
| BPh+ Nb                  | 2.15                     | —              |
| BPh+ Nb+ 1H <sub>2</sub> | 2.17                     | -0.69          |
| BPh+ Nb+ 3H <sub>2</sub> | 2.18                     | -0.69          |
| BPh+ Nb+ 5H <sub>2</sub> | 2.27                     | -0.46          |
